# Supplementary material for: Transition metal attenuated mechanism for protective alumina formation from first principles
Source: Royal Society of Chemistry journal article supplement (doi:10.1039/c8ra08195f), 2018-01-01
Supplement: c8ra08195f1.pdf [file c8ra08195f1.pdf]

## Electronic Supplementary Information

# Transition Metal Attenuated Mechanism for Protective Alumina Formation from First Principles

Vedad Babic,<sup>\*a</sup> Christine Geers<sup>a</sup> and Itai Panas<sup>a</sup>

**Table S1.** Total energies [eV] of  $\text{Al}_{47}\text{O}_{71}\text{TM}$  super cells where the oxygen vacancy ( $\text{V}_\text{O}$ ) position is varied w.r.t. TM- $\text{V}_\text{O}$  distance. All energies relative to vacancy at 5.1 Å. See Figure S1.

| Distance [Å] | 2.0 [Start] | 3.5    | 3.9    | 4.4 [End] | 5.1 |
|--------------|-------------|--------|--------|-----------|-----|
| Sc           | -0.342      | -0.003 | -0.055 | -0.086    | 0   |
| Co           | -1.71       | 0.000  | -0.009 | -0.122    | 0   |
| Ti           | -0.653      | 0.006  | 0.026  | -0.035    | 0   |

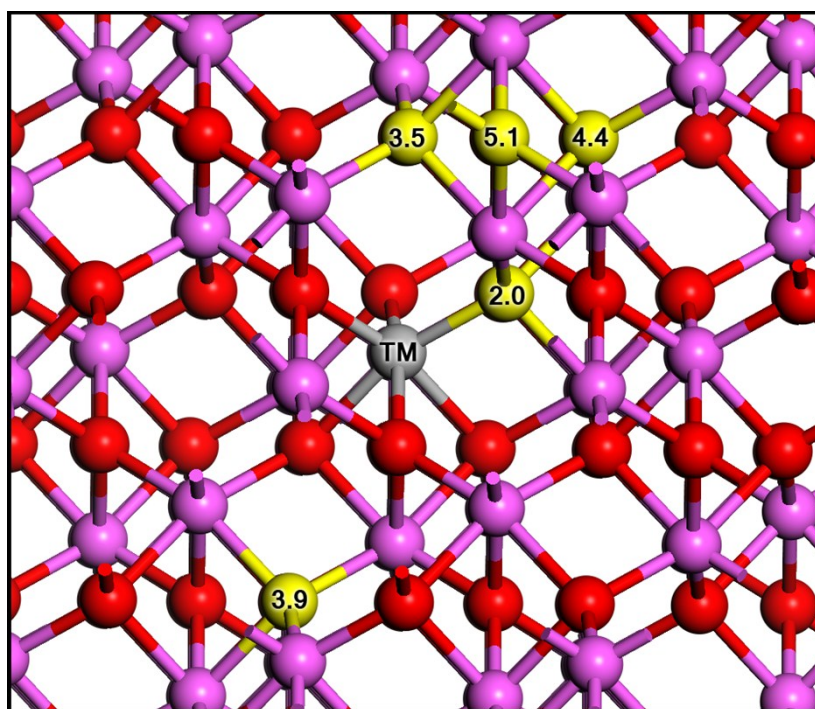

**Figure S1.** The oxygen ions which are deleted to form vacancies in Table S1. Numbers denote the TM-O distance in Ångström.

**Table S2.**  $\Delta E_A^*$ ,  $\Delta E_B^*$ , and APES,  $Q = 0$ , for various TM's with specified spin state in brackets. In case multiple computed spin states, the ground state is specified w.r.t. "End" geometry and is **bold**. All results in eV.

| TM (Spin)      | Al (0)     | Sc (0)     | Ti (1)     | V (2)      | Cr (3)     | Mn (4)     |
|----------------|------------|------------|------------|------------|------------|------------|
| $\Delta E_A^*$ | <b>4.6</b> | <b>4.4</b> | <b>4.1</b> | <b>3.7</b> | <b>3.7</b> | <b>3.3</b> |
| $\Delta E_B^*$ | <b>4.6</b> | <b>4.1</b> | <b>3.5</b> | <b>3.1</b> | <b>2.9</b> | <b>1.9</b> |
| APES(0)        | <b>0.0</b> | <b>0.3</b> | <b>0.6</b> | <b>0.6</b> | <b>0.8</b> | <b>1.4</b> |
| Fe (1)         | Fe (3)     | Fe (5)     | Co (0)     | Co (2)     | Ni (1)     | Ga (0)     |
| 3.4            | <b>3.1</b> | 3.2        | <b>3.4</b> | 2.8        | <b>2.9</b> | <b>4.5</b> |
| 2.2            | <b>1.7</b> | 1.9        | <b>1.8</b> | 1.3        | <b>1.4</b> | <b>3.0</b> |
| 1.2            | <b>1.4</b> | 1.3        | <b>1.6</b> | 1.6        | <b>1.5</b> | <b>1.5</b> |

**Table S3.**  $\Delta E_A^*$ ,  $\Delta E_B^*$ , and APES,  $Q = +1$ , for various TM's with specified spin state in brackets. In case multiple computed spin states, the ground state is specified w.r.t. "End" geometry and is **bold**. All results in eV.

| TM (Spin)      | Al (1)     | Sc (1)     | Ti (0)     | Ti (2)     | V (1)      | V (3)      |
|----------------|------------|------------|------------|------------|------------|------------|
| $\Delta E_A^*$ | <b>3.1</b> | <b>2.9</b> | 3.4        | <b>2.6</b> | 2.8        | <b>2.3</b> |
| $\Delta E_B^*$ | <b>3.1</b> | <b>2.6</b> | 3.1        | <b>2.1</b> | 2.4        | <b>1.7</b> |
| APES(+1)       | <b>0.0</b> | <b>0.3</b> | 0.3        | <b>0.5</b> | 0.4        | <b>0.6</b> |
|                | Cr (4)     | Mn (3)     | Mn (5)     | Fe (4)     | Co (1)     | Ni (2)     |
|                | <b>2.4</b> | 2.5        | <b>1.8</b> | <b>2.0</b> | <b>2.0</b> | <b>1.8</b> |
|                | <b>1.6</b> | 1.3        | <b>0.8</b> | <b>0.9</b> | <b>0.8</b> | <b>1.0</b> |
|                | <b>0.7</b> | 1.3        | <b>1.0</b> | <b>1.1</b> | <b>1.1</b> | <b>0.8</b> |

**Table S4.**  $\Delta E_A^*$ ,  $\Delta E_B^*$ , and APES,  $Q = +2$ , for various TM's with specified spin state in brackets. In case multiple computed spin states, the ground state is specified w.r.t. "End" geometry and is **bold**. All results in eV.

| TM (Spin)      | Al (0)     | Sc (0)      | Ti (1)     | V (2)      | Cr (3)      | Ni (1)     |
|----------------|------------|-------------|------------|------------|-------------|------------|
| $\Delta E_A^*$ | <b>1.7</b> | <b>1.4</b>  | <b>1.9</b> | <b>1.6</b> | <b>1.6</b>  | <b>1.8</b> |
| $\Delta E_B^*$ | <b>1.7</b> | <b>1.5</b>  | <b>1.9</b> | <b>1.4</b> | <b>1.7</b>  | <b>1.1</b> |
| APES(+2)       | <b>0.0</b> | <b>-0.1</b> | <b>0.1</b> | <b>0.2</b> | <b>-0.1</b> | <b>0.7</b> |
| Mn (0)         | Mn (2)     | Mn (4)      | Fe (1)     | Fe (3)     | Co (0)      | Co (2)     |
| -              | -          | <b>1.7</b>  | 1.7        | <b>1.8</b> | <b>1.7</b>  | 1.7        |
| -              | -          | <b>1.0</b>  | 1.6        | <b>1.1</b> | <b>1.8</b>  | 1.1        |
| 0.0            | 0.1        | <b>0.7</b>  | 0.1        | <b>0.7</b> | <b>-0.1</b> | 0.7        |

## S1 – Asymmetry in the potential energy surface (APES)

Signature of the APES is sought in the changes in oxygen bond lengths towards the five-coordinated TM ion where the sixth coordination is towards the oxygen vacancy, see Figure S2. It is observed how

the  $O_5$  becomes a sensitive probe of the vacancy charge. Successively, for  $Q = 0, +1, +2$  the  $TM-O_5$  bond goes from being significantly longer than the average  $TM-O$  bond to becoming increasingly similar to the average for  $Q = +2$ . Repulsion towards  $O_5$  anion is taken to reflect an electron rich  $TM-V_o$  moiety or Pauli repulsion towards the TM. In case of  $Q = 0$ , significant  $TM-O_5$  elongation as compared to  $Al-O_5$  is observed. This suggests greater attraction between oxygen vacancy and TMs than to Al. The effect prevails to some extent in case of  $Q = +1$ , cf. right panel in Figure S2 (centre graph) and APES in Figure 3A & 3B. For  $Q = +2$ , the small difference between  $TM-O_5$  and  $Al-O_5$  bond distances is taken to reflect bare Pauli repulsion between  $O_5$  and the 3d shells in case of TM, see Figure S2 right panel again (bottom graph), including spin dependent anomalies for  $TM = Mn, Fe, Co, Ni$ . The  $Q = +2$  APES apparently reflects spin dependent geometrical relaxations utilizing the vacancy, thus favouring the Start structure. Indeed, on increasing the occupation of the 3d shell, high-spin states tend to cause more Pauli repulsion toward the  $O_5$  owing to ligand field effects, see ref. <sup>S1</sup>. In case of Mn, the connection between  $O_5$ -TM bond distance and spin density along the  $O_5$ -TM- $V_o$  axis comes out clearly, see Figure S3. This effect in turn is taken to disfavour a vicinal  $O_6$  residing in the  $V_o$ , when comparing to the  $O_5$ -Al- $O_6$  structure, and thus cause APES for  $Q = +2$ .

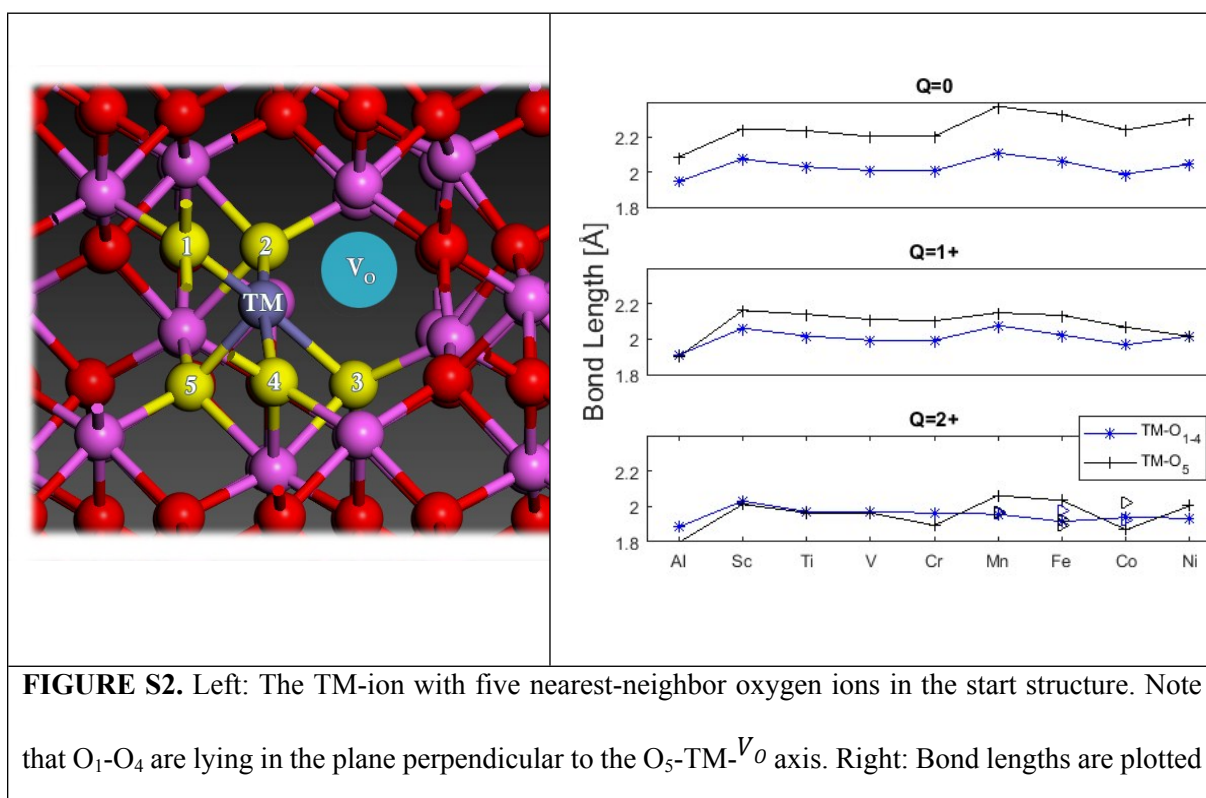

for  $O_1$ - $O_4$  (mean value) and  $O_5$  for  $Q = 0$  (top);  $Q = +1$  (centre);  $Q = +2$  (bottom). Triangles denote excited spin states. Gradual quasi-monotonic shrinking of TM- $O_5$  distances with increased charge is shown (top-centre-bottom), while negligible effects of charge on average TM-( $O_1$ - $O_4$ ) is found. Bond distance variations for ( $Q = +2$ ) TM- $O_5$  reflect those in Figure 4c. For impact of spin-state on bond distance modulations, see text.

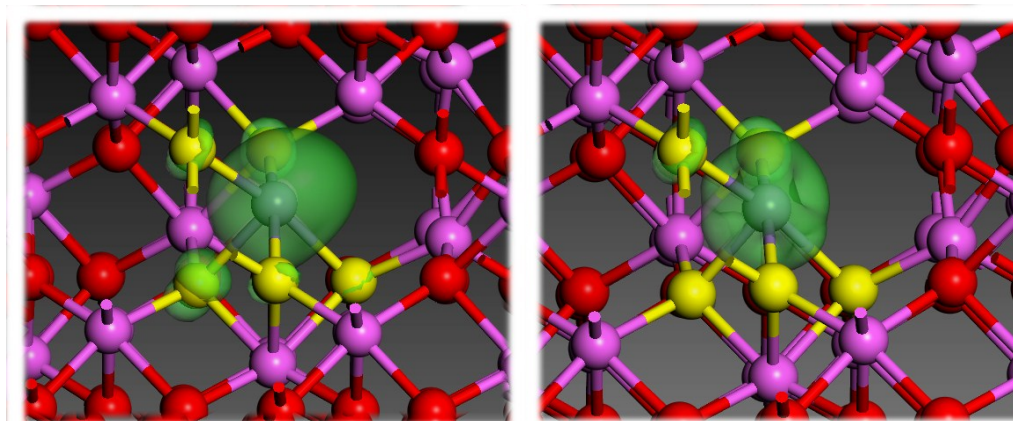

**FIGURE S3.** *Left:* The ground state spin density of nominal Mn(III)- $V_o$  ( $Q = +2$ ). *Right:* Excited state of the system. Note the spin density on  $O_5$  which disappears in case of the excited state.

Additionally, the fact that  $Q = +2$  displays very little APES suggest that the 3d shell to some extent takes a spectator role. Thus, the dramatic 3d bands shifting relative to the Fermi energy with increasing atom number is taken to exclusively signify shrinking of the TM ions due to the increased nuclear charge, see Figure 2 again. That APES results from 3d binding to the vacancy is contradicted by the absence of spin dependence in the APES of nominal Fe(III)- $V_o$  ( $Q = 0$ ), i.e. not differentiating between high-spin and low-spin stabilities, see Table S2.

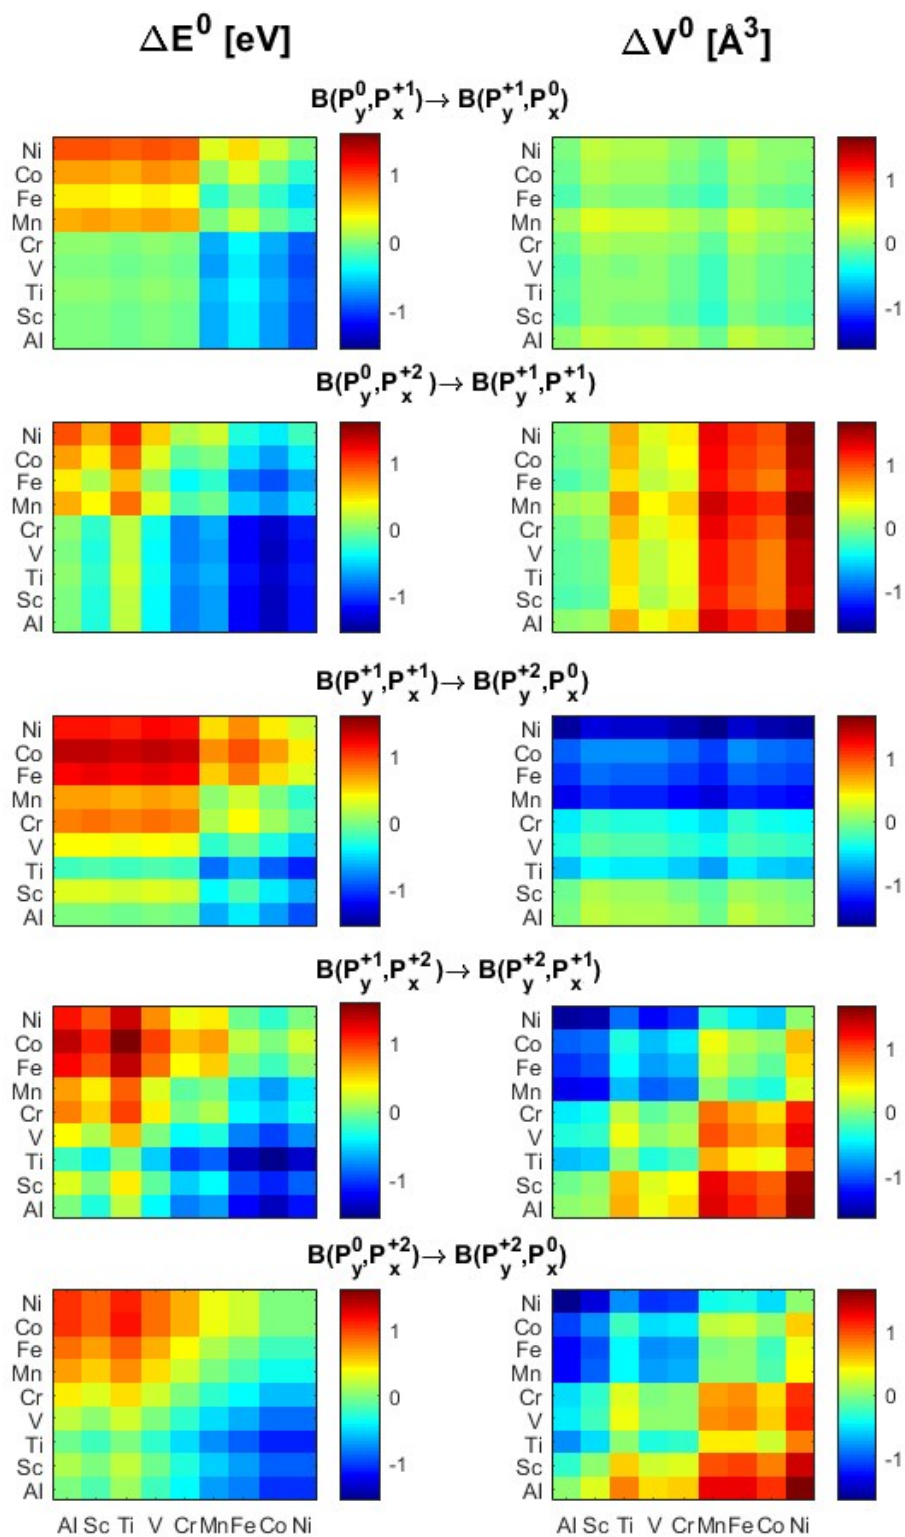

**FIGURE S4.** (left) Reaction energy matrices for  $\Delta E^0$  and (right) corresponding reaction volume matrices for equations P1.1-P1.5.

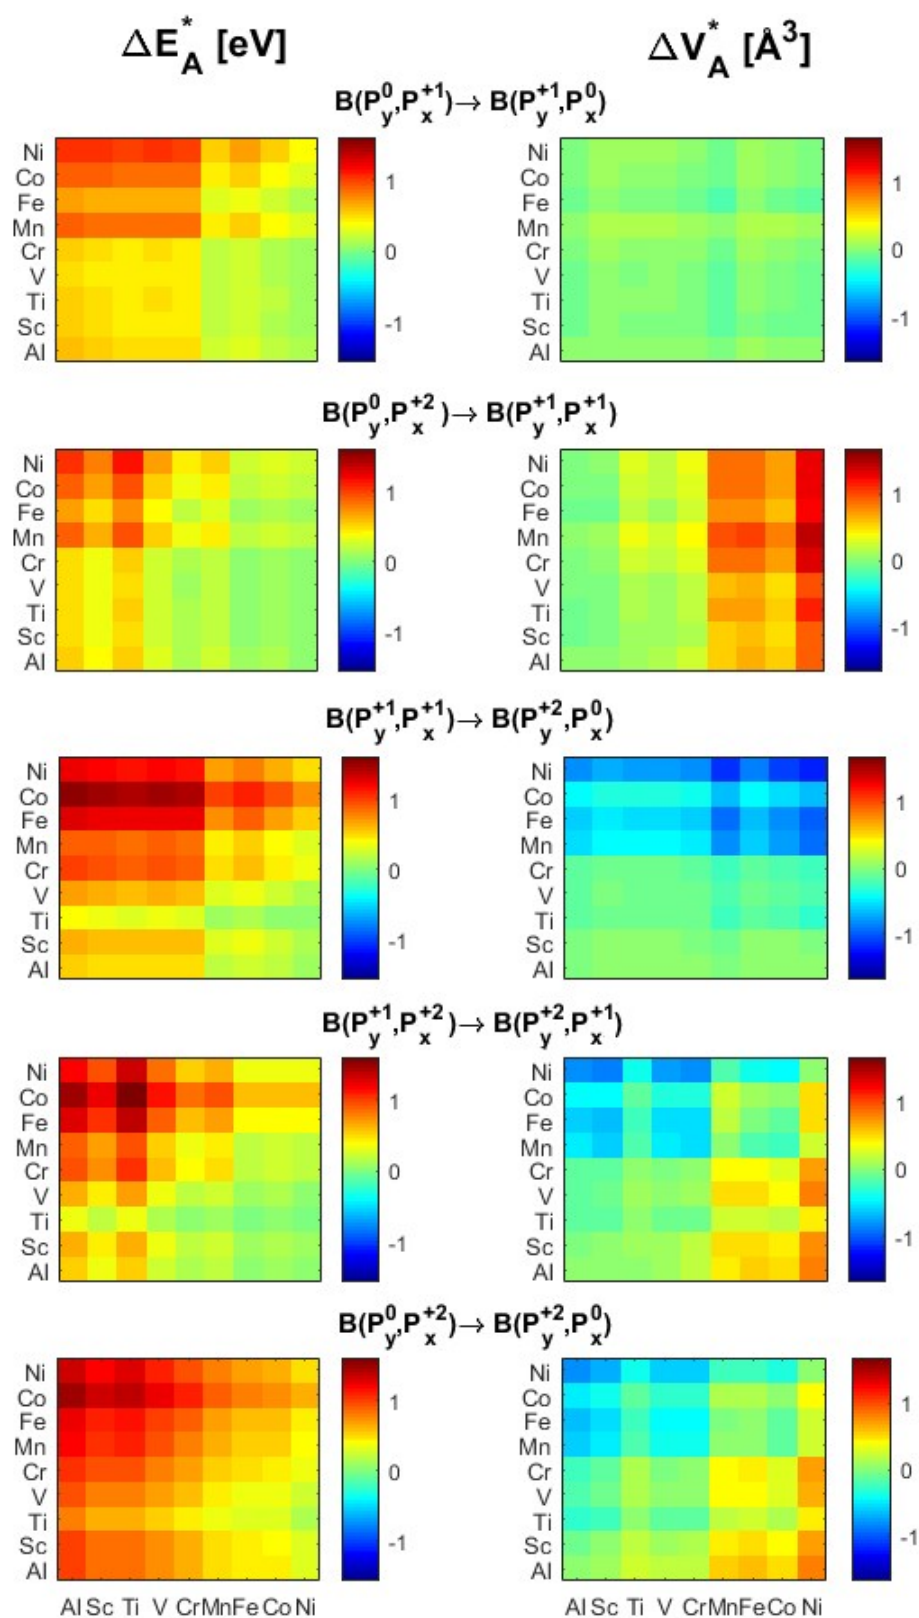

**FIGURE S5.** (left) Reaction energy matrices for  $\Delta E_A^*$  and (right) corresponding reaction volume matrices for equations P1.1-P1.5.

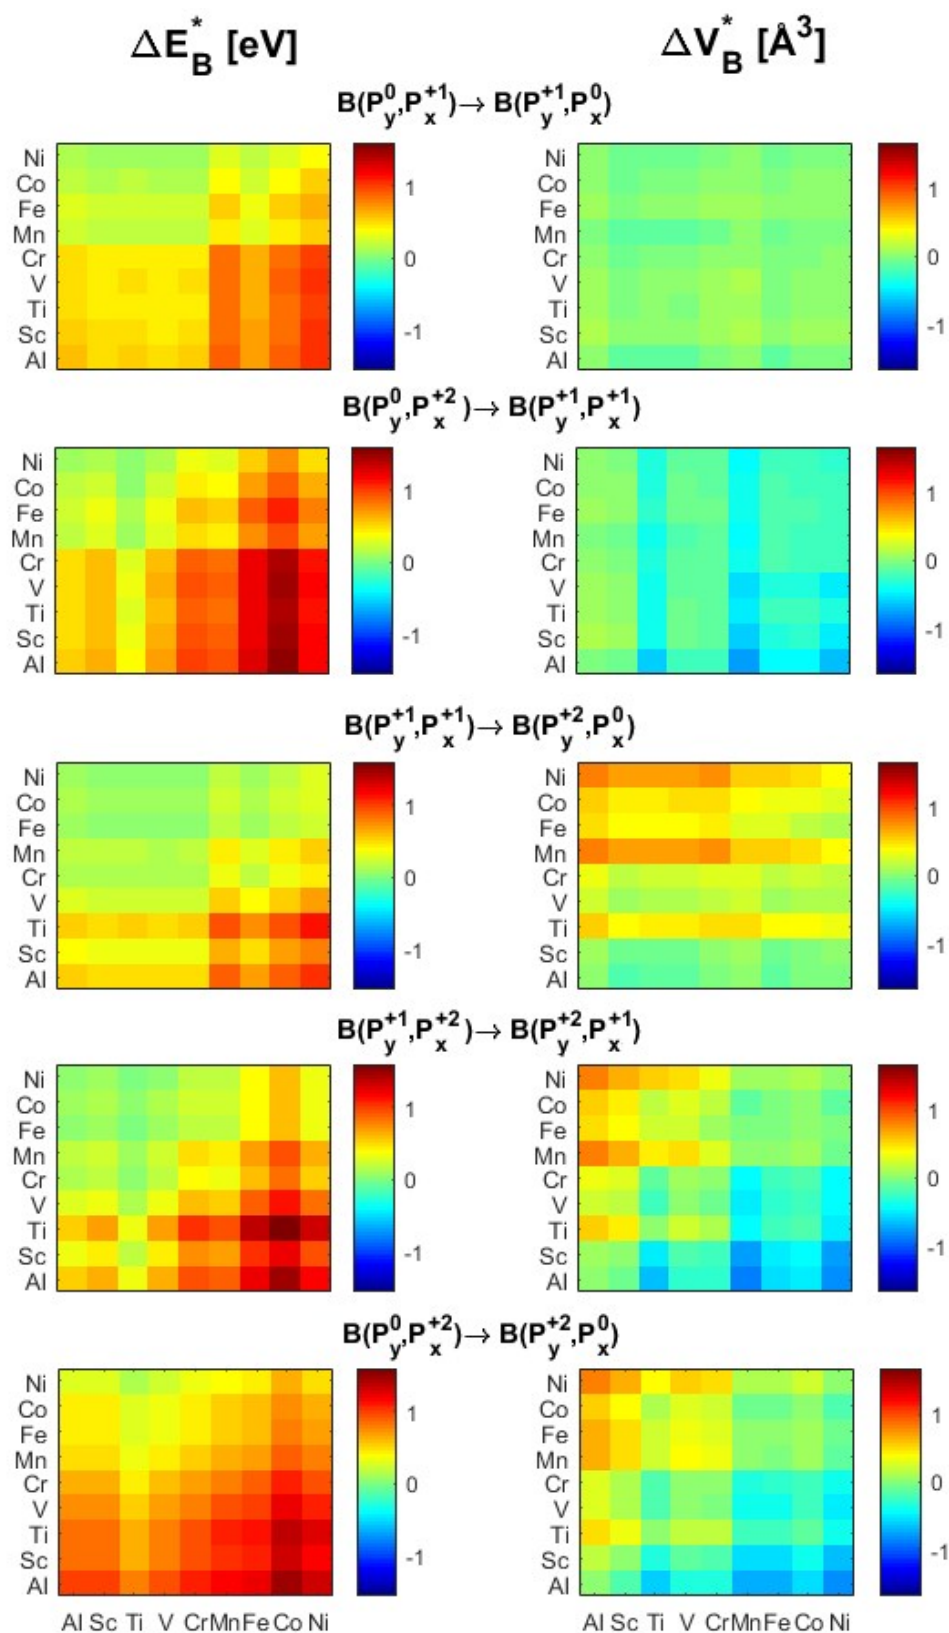

**FIGURE S6.** (left) Reaction energy maps for  $\Delta E_B^*$  and (right) corresponding reaction volume maps for equations P1.1-P1.5.

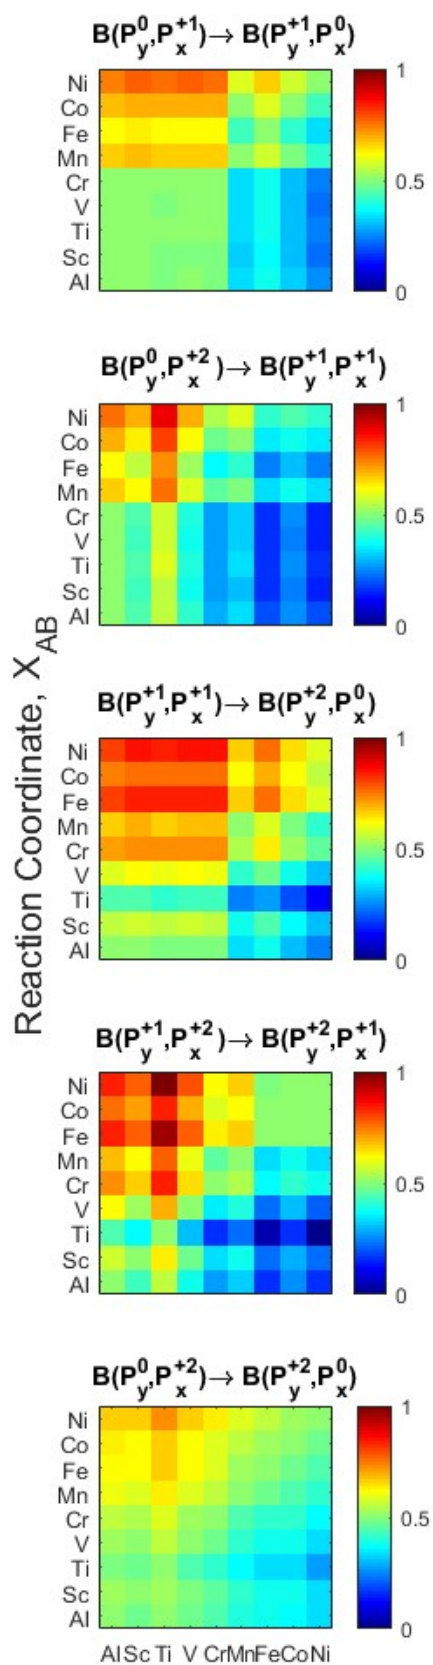

**FIGURE S7.** Reaction coordinate  $X_{AB}$ , cf. Figure 2 of the crossing between  $\Psi_A(q)$  and  $\Psi_B(q)$  for processes P1.1-P1.5.



## S2 – Asymmetric polaron transfer processes P1.2 and P1.3

It should be born in mind throughout the present paragraph that it is differential effects regarding electron trapping among TM associated oxygen vacancies which are sought, i.e. preference for the reduction of the oxygen vacancy site adjacent to TM(III) on expense of an oxygen vacancy in alumina which becomes oxidized. While charging in the electron transfer reactions generally cancel, this does not apply in case of the asymmetric reactions

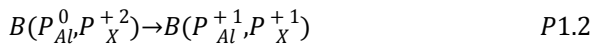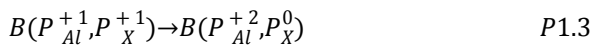

Thus, numerical similarities with the corresponding reactions

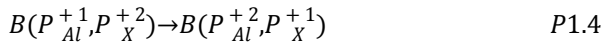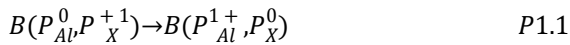

become artefacts of the background charge density that renders the charged supercells screened. The connection between the two pairs becomes obvious upon appropriately offsetting the charging effect by symmetrizing the asymmetric equations analogous to Figure 13, see acute brackets below,

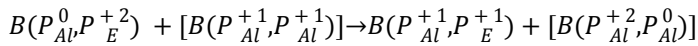

↔

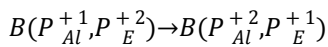

and

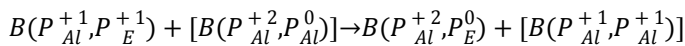

↔

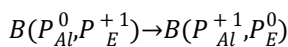

## References

- S1 M. Lindgren and I. Panas, *RSC Adv.*, 2013, 3, 21613-21619.
